# Supplementary material for: Peers versus professional training of basic life support in Syria: a randomized controlled trial
Source: PubMed Central journal article supplement (PMC6006697; doi:10.1186/s12909-018-1241-z), 2018-06-18
Supplement: 12909_2018_1241_MOESM1_ESM.pdf [file 12909_2018_1241_MOESM1_ESM.pdf]

# BASIC LIFE SUPPORT TEST

| <u>Interventions :</u>                                  | <u>Competent</u> | <u>Not competent</u> |
|---------------------------------------------------------|------------------|----------------------|
| Safe approach .                                         |                  |                      |
| Stimulate the patient .                                 |                  |                      |
| Shout for help .                                        |                  |                      |
| Open airway .                                           |                  |                      |
| Look – listen – feel for not more than 10 s .           |                  |                      |
| Call ambulance .                                        |                  |                      |
| 30 chest compressions( depth , position ).<br>100 / M . |                  |                      |
| 2 rescuer breath ( not more than 5 s ) .                |                  |                      |
| Ratio 30 / 2 :                                          |                  |                      |
| <b>COMMENTS :</b>                                       |                  |                      |
| <br>                                                    |                  |                      |
| <b>RESULT :</b>                                         |                  |                      |
| <b>Pass :</b>                                           | <b>Retest :</b>  | <b>Failed :</b>      |
|                                                         |                  |                      |
